# Supplementary material
Source: Atypon-hosted journal article supplement (doi:10.1287/msom.2024.1353)
Supplement: msom.2024.1353.sm1.pdf [file msom.2024.1353.sm1.pdf]

## Online Appendices

### Online Appendix A: Sampling Steps

**Table OA.1 Detailed Sampling Steps**

|   | Sampling step                                                                                                                                          | Sample size after each sampling step        |
|---|--------------------------------------------------------------------------------------------------------------------------------------------------------|---------------------------------------------|
| 1 | Risk scores collected from July 2019 to December 2022                                                                                                  | 72,369                                      |
| 2 | Exclude flagged risk scores of patients who had a colonoscopy before the outreach                                                                      | 72,364                                      |
| 3 | Exclude flagged risk scores that were not outreached after a chart review (because, for example, the patient was deceased or admitted to the hospital) | 72,094                                      |
| 4 | Exclude risk scores of patients who are aged 50                                                                                                        | 69,482                                      |
| 5 | For patients with multiple risk scores, limit one risk score per each month per patient (include only the patient's highest risk score in each month)  | 62,485<br>Treated: 1,521<br>Control: 60,964 |

## Online Appendix B: Figures with Quadratic Regressions

**Figure OA.1** Balance of Predetermined Characteristics with Quadratic Regressions

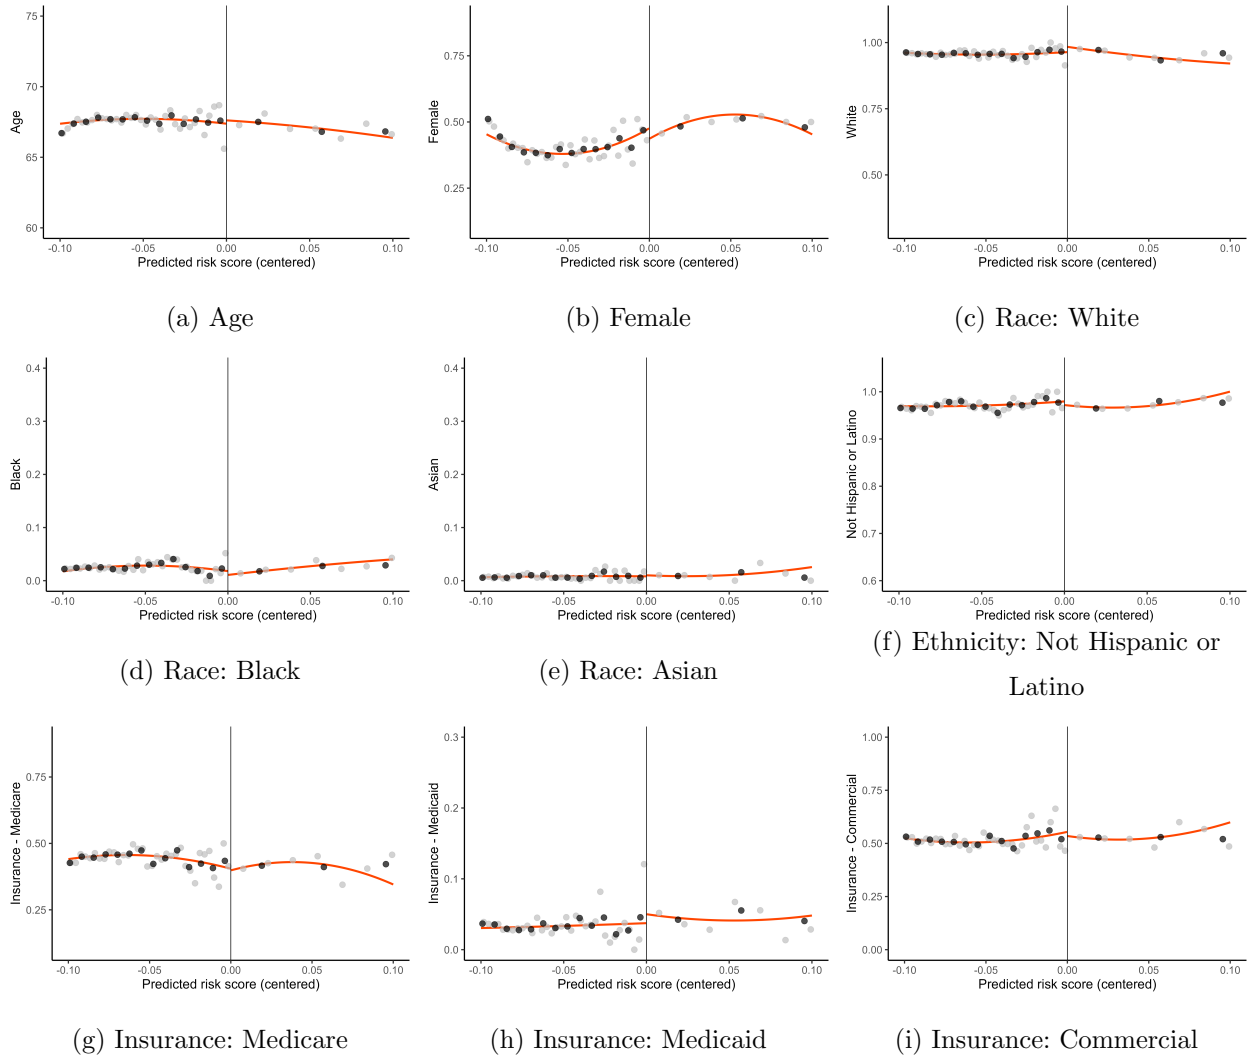

*Notes.* The figure plots the characteristics of the sample. Black points present the average value of the specified variable for risk scores with 20 bins on each side of the cutoff. Gray points present the average value of the specified variable for risk scores with 50 bins on each side of the cutoff. The solid vertical line represents the cutoff risk score value. The solid, red trend lines are the predicted values from local quadratic regression fits of the specified variable on the score, fitted separately above and below the cutoff, that uses a triangular kernel and a bandwidth of 0.10 on each side.

Figure OA.2 RD Plots with Quadratic Regressions

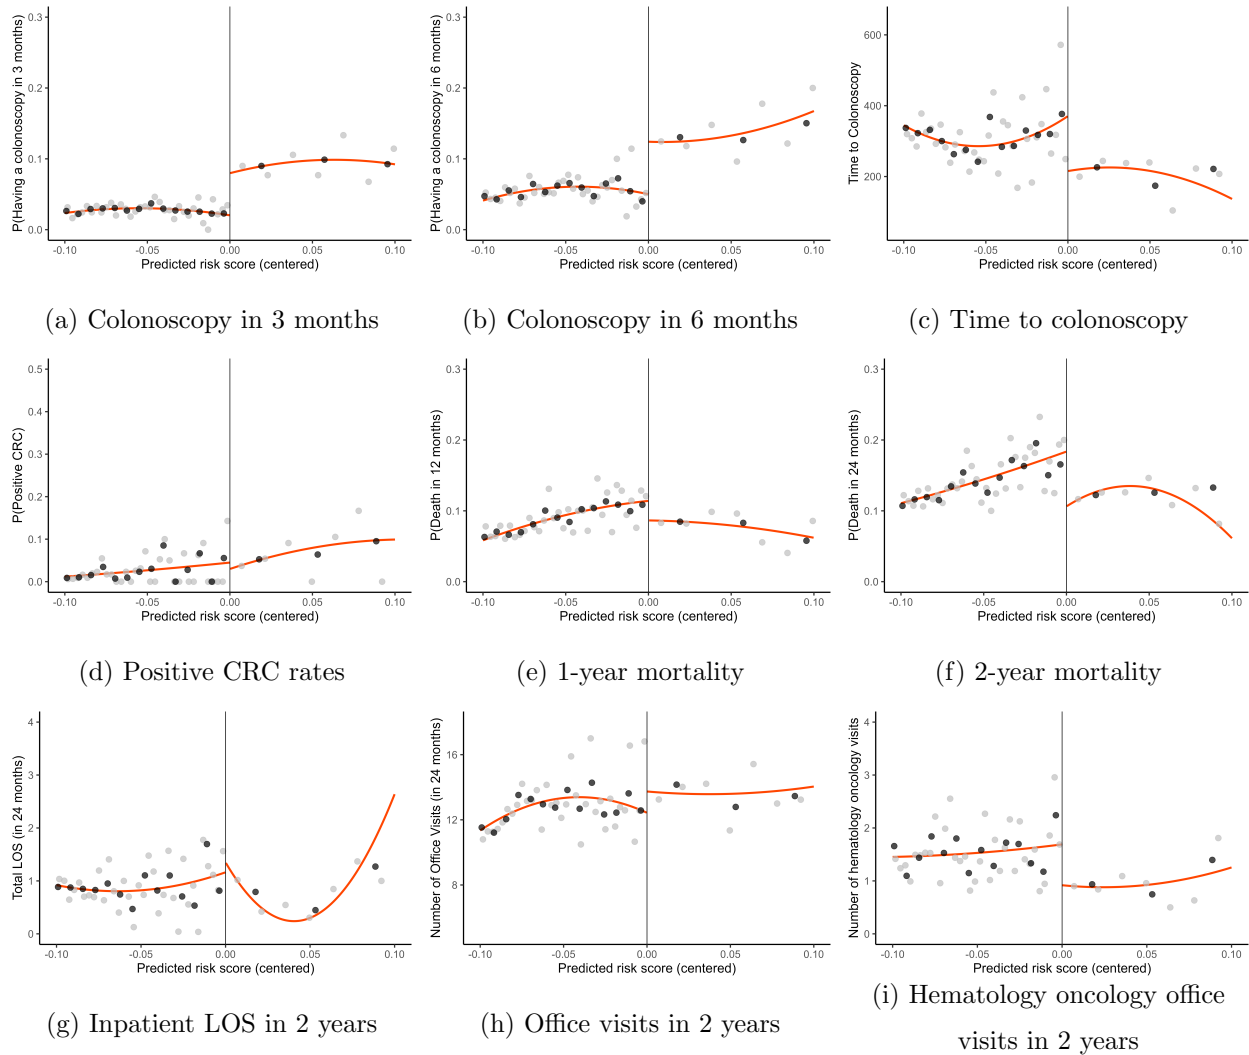

Notes. Black points present the average value of the specified variable for risk scores with 20 bins on each side of the cutoff. Gray points present the average value of the specified variable for risk scores with 50 bins on each side of the cutoff. The solid vertical line represents the cutoff risk score value. The solid, red trend lines are the predicted values from local quadratic regression fits of the specified variable on the score, fitted separately above and below the cutoff, that uses a triangular kernel and a bandwidth of 0.10 on each side. CRC: colorectal cancer, LOS: length of stay.

## Online Appendix C: Distribution of Risk Score

**Figure OA.3** Density of Running Variable

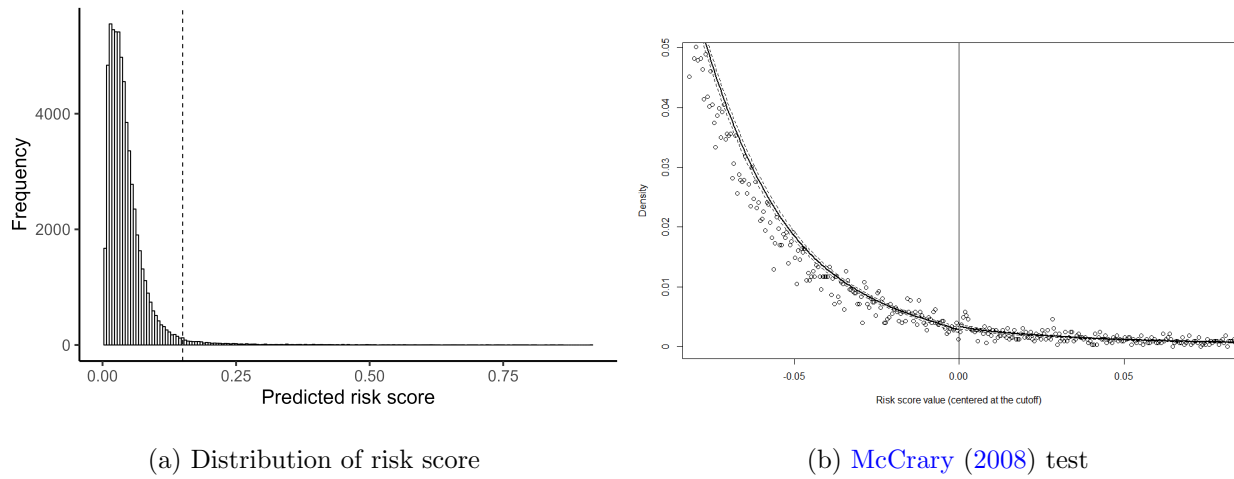

*Notes.* Panel (a) shows the distribution of predicted risk score for the entire range, with a bin width of 0.005. Panel (b) shows the densities computed over bins with a width of 0.0005, around the cutoff point. The line plots a nonparametric regression to each side of the distribution following [McCrary \(2008\)](#), testing for a discontinuity at zero. The test fails to reject the null hypothesis of no discontinuity in the density at the cutoff ( $p$ -value = 0.154).

**Online Appendix D: Analysis of Inpatient LOS by Specialty****Table OA.2 Effects on Inpatient LOS by Specialty at the Cutoff**

| Outcome<br>Specialty                       | 2-year LOS        |                         |                   |                  |
|--------------------------------------------|-------------------|-------------------------|-------------------|------------------|
|                                            | ICU<br>(1)        | Medical/Surgical<br>(2) | Oncology<br>(3)   | Radiology<br>(4) |
| <i>Panel A. Local linear regression</i>    |                   |                         |                   |                  |
| Flag                                       | -0.177<br>(0.174) | 0.125<br>(0.875)        | -0.075<br>(0.065) | 0.003<br>(0.002) |
| Controls                                   | Yes               | Yes                     | Yes               | Yes              |
| Bandwidth<br>(interval)                    | [-0.045, 0.032]   | [-0.062, 0.073]         | [-0.077, 0.096]   | [-0.077, 0.096]  |
| Mean below cutoff                          | 0.111             | 0.515                   | 0.180             | 0.004            |
| Observations                               | 682               | 1,246                   | 2,016             | 2,016            |
| <i>Panel B. Local quadratic regression</i> |                   |                         |                   |                  |
| Flag                                       | 0.036<br>(0.185)  | 0.197<br>(1.038)        | -0.006<br>(0.061) | 0.001<br>(0.003) |
| Controls                                   | Yes               | Yes                     | Yes               | Yes              |
| Bandwidth<br>(interval)                    | [-0.034, 0.061]   | [-0.081, 0.120]         | [-0.100, 0.145]   | [-0.100, 0.145]  |
| Mean below cutoff                          | 0.157             | 0.484                   | 0.163             | 0.005            |
| Observations                               | 535               | 2,340                   | 4,523             | 4,523            |

*Notes.* Panels A and B present the estimates using local linear regression and local quadratic regression, respectively, with a triangular weighting kernel. Control variables include age, sex, and race. Bandwidth shows the interval centered around the cutoff point, 0.150, using MSE optimal bandwidths (Calonico et al. 2014). For columns 3 and 4, MSE optimal bandwidths cannot be calculated due to too many zero values; we use the bandwidths in Table 4 column 5 and column 6. The observations row shows effective observations within the bandwidth. Robust standard errors are reported in parentheses. Total observations: 15,633 include Geisinger Health Plan holders with risk scores collected until December 2021. \* $p < 0.05$ , \*\* $p < 0.01$ , \*\*\* $p < 0.001$ .

**Online Appendix E: Analysis of Office Visits by Specialty****Table OA.3 Effects on 2-year Office Visits by Relevant Specialty at the Cutoff**

| Outcome<br>Specialty                       | Number of visits in 2 years |                  |                      |                       |
|--------------------------------------------|-----------------------------|------------------|----------------------|-----------------------|
|                                            | Family Medicine             | General Surgery  | Internal<br>Medicine | Radiation<br>Oncology |
|                                            | (1)                         | (2)              | (3)                  | (4)                   |
| <i>Panel A. Local linear regression</i>    |                             |                  |                      |                       |
| Flag                                       | 0.245<br>(0.620)            | 0.286<br>(0.153) | -0.006<br>(0.183)    | 0.025<br>(0.128)      |
| Controls                                   | Yes                         | Yes              | Yes                  | Yes                   |
| Bandwidth<br>(interval)                    | [-0.075, 0.097]             | [-0.041, 0.085]  | [-0.043, 0.146]      | [-0.036, 0.085]       |
| Mean below cutoff                          | 4.485                       | 0.158            | 0.306                | 0.146                 |
| Observations                               | 1,885                       | 710              | 806                  | 621                   |
| <i>Panel B. Local quadratic regression</i> |                             |                  |                      |                       |
| Flag                                       | 0.235<br>(0.724)            | 0.281<br>(0.174) | -0.005<br>(0.220)    | 0.067<br>(0.151)      |
| Controls                                   | Yes                         | Yes              | Yes                  | Yes                   |
| Bandwidth<br>(interval)                    | [-0.087, 0.159]             | [-0.052, 0.159]  | [-0.070, 0.204]      | [-0.055, 0.105]       |
| Mean below cutoff                          | 4.466                       | 0.207            | 0.290                | 0.153                 |
| Observations                               | 2,861                       | 1,039            | 1,699                | 1,065                 |

*Notes.* Panels A and B present the estimates using local linear regression and local quadratic regression, respectively, with a triangular weighting kernel. Control variables include age, sex, and race. Bandwidth shows the interval centered around the cutoff point, 0.150, using MSE optimal bandwidths (Calonico et al. 2014). The observations row shows effective observations within the bandwidth. Robust standard errors are reported in parentheses. Total observations: 15,633 include Geisinger Health Plan holders with risk scores collected until December 2021. \* $p < 0.05$ , \*\* $p < 0.01$ , \*\*\* $p < 0.001$ .

**Online Appendix F: Placebo Outcomes**

**Table OA.4 Effects on Unrelated Outcomes**

| Outcome           | 2-year LOS: Orthopedics |                   | 2-year LOS: Psychiatry |                   |
|-------------------|-------------------------|-------------------|------------------------|-------------------|
|                   | Linear<br>(1)           | Quadratic<br>(2)  | Linear<br>(3)          | Quadratic<br>(4)  |
| Flag              | 0.001<br>(0.019)        | -0.010<br>(0.026) | -0.017<br>(0.016)      | -0.021<br>(0.021) |
| Controls          | Yes                     | Yes               | Yes                    | Yes               |
| Mean below cutoff | 0.003                   | 0.003             | 0.018                  | 0.010             |
| Observations      | 1,091                   | 2,152             | 1,091                  | 2,152             |

*Notes.* The table presents the estimates using local linear regression (columns 1 and 3) and local quadratic regression (columns 2 and 4). Control variables include age, sex, and race. Robust standard errors are reported in parentheses. We use the bandwidths in [Table 5](#) column 1 and column 2 because MSE optimal bandwidths cannot be calculated due to too many zero values. As [Table 5](#), analyses include Geisinger Health Plan holders with risk scores collected until December 2021 (Total observations: 15,633). <sup>+</sup> $p < 0.1$ , \*  $p < 0.05$ , \*\*  $p < 0.01$ , \*\*\*  $p < 0.001$ .

**Online Appendix G: Robustness to Different Kernels****Table OA.5** Effects on Colonoscopy Uptake and Mortality at the Cutoff Using Different Kernels

| Outcome<br>Kernels      | Colonoscopy in 3 months |                    |                    |                    | 2-year mortality    |                    |                    |                    |
|-------------------------|-------------------------|--------------------|--------------------|--------------------|---------------------|--------------------|--------------------|--------------------|
|                         | Uniform                 |                    | Epanechnikov       |                    | Uniform             |                    | Epanechnikov       |                    |
|                         | (1)<br>Linear           | (2)<br>Quadratic   | (3)<br>Linear      | (4)<br>Quadratic   | (5)<br>Linear       | (6)<br>Quadratic   | (7)<br>Linear      | (8)<br>Quadratic   |
| Flag                    | 0.053**<br>(0.019)      | 0.050*<br>(0.024)  | 0.063**<br>(0.019) | 0.061**<br>(0.021) | -0.087**<br>(0.033) | -0.080*<br>(0.035) | -0.068*<br>(0.028) | -0.075*<br>(0.035) |
| Controls                | Yes                     | Yes                | Yes                | Yes                | Yes                 | Yes                | Yes                | Yes                |
| Bandwidth<br>(interval) | [-0.042,<br>0.070]      | [-0.050,<br>0.093] | [-0.068,<br>0.063] | [-0.090,<br>0.108] | [-0.053,<br>0.039]  | [-0.086,<br>0.093] | [-0.080,<br>0.068] | [-0.107,<br>0.086] |
| Mean below<br>cutoff    | 0.025                   | 0.029              | 0.029              | 0.029              | 0.150               | 0.138              | 0.140              | 0.121              |
| Observations            | 2,622                   | 3,449              | 5,803              | 13,072             | 2,753               | 8,520              | 6,958              | 17,759             |
| Control                 | 1,834                   | 2,549              | 5,058              | 12,103             | 2,304               | 7,824              | 6,356              | 17,086             |
| Treated                 | 788                     | 900                | 745                | 969                | 449                 | 696                | 602                | 673                |

*Notes.* The table presents the estimate using uniform and Epanechnikov kernel functions. Control variables include age, sex, race, and insurance type (Medicare, Medicaid, military, commercial, self-pay). Bandwidth shows the interval centered at the cutoff point, 0.150. The observations row shows effective observations within the bandwidth. Robust standard errors are reported in parentheses. For columns 7 to 8, risk scores collected before January 2022 are included. <sup>+</sup> $p < 0.1$ , \* $p < 0.05$ , \*\* $p < 0.01$ , \*\*\* $p < 0.001$ .

**Online Appendix H: Robustness to Different Samples****Table OA.6** Effects on Colonoscopy Uptake and Mortality at the Cutoff Using Different Samples

| Sample<br>Outcome       | Sample including aged 50 |                    |                         |                    |                    |                    |
|-------------------------|--------------------------|--------------------|-------------------------|--------------------|--------------------|--------------------|
|                         | Colonoscopy in 3 months  |                    | Colonoscopy in 6 months |                    | 2-year mortality   |                    |
|                         | Linear<br>(1)            | Quadratic<br>(2)   | Linear<br>(3)           | Quadratic<br>(4)   | Linear<br>(5)      | Quadratic<br>(6)   |
| Flag                    | 0.062**<br>(0.019)       | 0.063**<br>(0.022) | 0.073**<br>(0.023)      | 0.075**<br>(0.025) | -0.070*<br>(0.028) | -0.074*<br>(0.034) |
| Controls                | Yes                      | Yes                | Yes                     | Yes                | Yes                | Yes                |
| Bandwidth<br>(interval) | [-0.069,<br>0.073]       | [-0.085,<br>0.108] | [-0.067,<br>0.072]      | [-0.104,<br>0.140] | [-0.086,<br>0.070] | [-0.111,<br>0.101] |
| Mean below cutoff       | 0.030                    | 0.029              | 0.060                   | 0.053              | 0.136              | 0.117              |
| Observations            | 6,088                    | 11,037             | 5,788                   | 21,387             | 8,696              | 20,700             |

*Notes.* The table presents the estimates using local linear regression (columns 1, 3, and 5) or local quadratic regression (columns 2, 4, and 6) with a triangular weighting kernel. Bandwidth shows the interval centered around the cutoff point, 0.150, using MSE optimal bandwidths (Calonico et al. 2014). The observations row shows effective observations within the bandwidth. Robust standard errors are reported in parentheses. Total observations: 64,925 (columns 1, 2, 3, and 4), 48,895 (columns 5 and 6, includes risk scores until December 2021).  $^+p < 0.1$ ,  $*p < 0.05$ ,  $**p < 0.01$ ,  $***p < 0.001$ .

**Table OA.7** Effects on Colonoscopy Uptake and Mortality at the Cutoff Using One Risk Score per Patient

| Sample<br>Outcome       | One risk score per patient |                    |                         |                    |                    |                    |
|-------------------------|----------------------------|--------------------|-------------------------|--------------------|--------------------|--------------------|
|                         | Colonoscopy in 3 months    |                    | Colonoscopy in 6 months |                    | 2-year mortality   |                    |
|                         | Linear<br>(1)              | Quadratic<br>(2)   | Linear<br>(3)           | Quadratic<br>(4)   | Linear<br>(5)      | Quadratic<br>(6)   |
| Flag                    | 0.069**<br>(0.021)         | 0.073**<br>(0.025) | 0.084**<br>(0.027)      | 0.085**<br>(0.030) | -0.067*<br>(0.031) | -0.078*<br>(0.040) |
| Controls                | Yes                        | Yes                | Yes                     | Yes                | Yes                | Yes                |
| Bandwidth<br>(interval) | [-0.071,<br>0.079]         | [-0.085,<br>0.129] | [-0.064,<br>0.077]      | [-0.095,<br>0.162] | [-0.081,<br>0.067] | [-0.099,<br>0.086] |
| Mean below cutoff       | 0.038                      | 0.041              | 0.070                   | 0.071              | 0.116              | 0.102              |
| Observations            | 4,116                      | 6,305              | 3,394                   | 8,423              | 4,189              | 7,239              |

*Notes.* The table presents the estimates using local linear regression (columns 1, 3, and 5) or local quadratic regression (columns 2, 4, and 6) with a triangular weighting kernel. Control variables include age, sex, race, and insurance type (Medicare, Medicaid, military, commercial, self-pay). Bandwidth shows the interval centered around the cutoff point, 0.150, using MSE optimal bandwidths (Calonico et al. 2014). The observations row shows effective observations within the bandwidth. Robust standard errors are reported in parentheses. Total observations: 32,782 (columns 1 and 2), 24,227 (columns 5 and 6, includes risk scores until December 2021).  $^+p < 0.1$ ,  $*p < 0.05$ ,  $**p < 0.01$ ,  $***p < 0.001$ .

**Online Appendix I: Analysis using Log-transformed Risk Scores****Table OA.8** Effects on Colonoscopy Uptake and Mortality at the Cutoff Using Log-transformed Risk Scores

| Outcome                 | Colonoscopy in 3 months |                    | Colonoscopy in 6 months |                    | 2-year mortality   |                    |
|-------------------------|-------------------------|--------------------|-------------------------|--------------------|--------------------|--------------------|
|                         | Linear<br>(1)           | Quadratic<br>(2)   | Linear<br>(3)           | Quadratic<br>(4)   | Linear<br>(5)      | Quadratic<br>(6)   |
| Flag                    | 0.052**<br>(0.018)      | 0.052*<br>(0.022)  | 0.062**<br>(0.022)      | 0.067*<br>(0.027)  | -0.063*<br>(0.026) | -0.070*<br>(0.032) |
| Controls                | Yes                     | Yes                | Yes                     | Yes                | Yes                | Yes                |
| Bandwidth<br>(interval) | [-1.490,<br>0.432]      | [-1.579,<br>0.508] | [-1.494,<br>0.394]      | [-1.296,<br>0.527] | [-1.574,<br>0.361] | [-2.047,<br>0.466] |
| Mean below cutoff       | 0.033                   | 0.033              | 0.060                   | 0.060              | 0.079              | 0.079              |
| Observations            | 31,857                  | 34,938             | 32,017                  | 25,246             | 26,308             | 35,850             |

*Notes.* The table presents the estimates using local linear regression (columns 1, 3, and 5) or local quadratic regression (columns 2, 4, and 6) with a triangular weighting kernel. Control variables include age, sex, race, and insurance type (Medicare, Medicaid, military, commercial, self-pay). Bandwidth shows the interval of log-transformed risk score centered around the cutoff point,  $\log(0.150)$ , using MSE optimal bandwidths (Calonic et al. 2014). The observations row shows effective observations within the bandwidth. Robust standard errors are reported in parentheses. Total observations: 62,485 (columns 1, 2, 3, and 4); 46,994 (columns 5 and 6). <sup>+</sup> $p < 0.1$ , \*  $p < 0.05$ , \*\*  $p < 0.01$ , \*\*\*  $p < 0.001$ .

**Online Appendix J: Analysis using Clustered Standard Errors****Table OA.9** Effects on Colonoscopy Uptake and Mortality at the Cutoff Using Clustered Standard Errors

| Outcome                 | Colonoscopy in 3 months |                    | Colonoscopy in 6 months |                    | 2-year mortality   |                    |
|-------------------------|-------------------------|--------------------|-------------------------|--------------------|--------------------|--------------------|
|                         | Linear<br>(1)           | Quadratic<br>(2)   | Linear<br>(3)           | Quadratic<br>(4)   | Linear<br>(5)      | Quadratic<br>(6)   |
| Flag                    | 0.060**<br>(0.018)      | 0.059**<br>(0.021) | 0.069**<br>(0.023)      | 0.074**<br>(0.026) | -0.062*<br>(0.030) | -0.071*<br>(0.036) |
| Controls                | Yes                     | Yes                | Yes                     | Yes                | Yes                | Yes                |
| Bandwidth<br>(interval) | [-0.069,<br>0.074]      | [-0.086,<br>0.112] | [-0.071,<br>0.077]      | [-0.107,<br>0.112] | [-0.074,<br>0.097] | [-0.097,<br>0.147] |
| Mean below cutoff       | 0.028                   | 0.029              | 0.058                   | 0.052              | 0.147              | 0.129              |
| Observations            | 6,116                   | 11,452             | 6,545                   | 23,996             | 5,679              | 12,989             |

*Notes.* The table presents the estimates using local linear regression (columns 1, 3, and 5) or local quadratic regression (columns 2, 4, and 6) with a triangular weighting kernel. Control variables include age, sex, race, and insurance type (Medicare, Medicaid, military, commercial, self-pay). Bandwidth shows the interval of risk score centered around the cutoff point,  $\log(0.150)$ , using MSE optimal bandwidths (Calonico et al. 2014). The observations row shows effective observations within the bandwidth. Cluster (patient)-robust standard errors are reported in parentheses. Total observations: 62,485 (columns 1, 2, 3, and 4); 46,994 (columns 5 and 6). <sup>+</sup> $p < 0.1$ , \* $p < 0.05$ , \*\* $p < 0.01$ , \*\*\* $p < 0.001$ .

## Online Appendix K: Robustness to COVID-19 Pandemic

**Figure OA.4 Density of Running Variable**

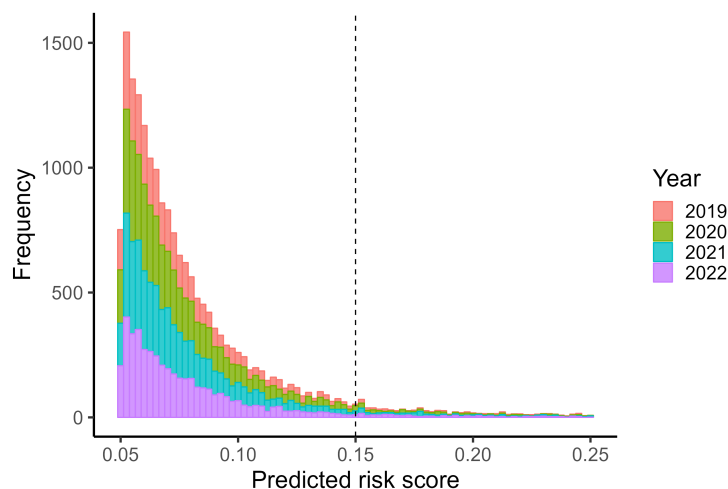

(a) Distribution of risk score by year

*Notes.* Figure plots the distribution of predicted risk score around the cutoff by year (color), with a bin width of 0.005.

**Table OA.10 Analysis with Year Effects**

| Outcome                 | With year effects       |                    |                         |                    |                    |                    |
|-------------------------|-------------------------|--------------------|-------------------------|--------------------|--------------------|--------------------|
|                         | Colonoscopy in 3 months |                    | Colonoscopy in 6 months |                    | 2-year mortality   |                    |
|                         | Linear<br>(1)           | Quadratic<br>(2)   | Linear<br>(3)           | Quadratic<br>(4)   | Linear<br>(5)      | Quadratic<br>(6)   |
| Flag                    | 0.069**<br>(0.021)      | 0.073**<br>(0.025) | 0.084**<br>(0.027)      | 0.085**<br>(0.030) | -0.067*<br>(0.031) | -0.078*<br>(0.040) |
| Controls                | Yes                     | Yes                | Yes                     | Yes                | Yes                | Yes                |
| Bandwidth<br>(interval) | [-0.071,<br>0.079]      | [-0.085,<br>0.129] | [-0.064,<br>0.077]      | [-0.095,<br>0.162] | [-0.081,<br>0.067] | [-0.099,<br>0.086] |
| Mean below cutoff       | 0.038                   | 0.041              | 0.070                   | 0.071              | 0.116              | 0.102              |
| Observations            | 4,116                   | 6,305              | 3,394                   | 8,423              | 4,189              | 7,239              |

*Notes.* The table presents the estimates using local linear regression (columns 1, 3, and 5) or local quadratic regression (columns 2, 4, and 6) with a triangular weighting kernel. Control variables include age, sex, race, insurance type (Medicare, Medicaid, military, commercial, self-pay), and year indicators. Bandwidth shows the interval centered around the cutoff point, 0.150, using MSE optimal bandwidths (Calonico et al. 2014). The observations row shows effective observations within the bandwidth. Robust standard errors are reported in parentheses. Total observations: 32,782 (columns 1 and 2), 24,227 (columns 5 and 6, includes risk scores until December 2021). <sup>+</sup> $p < 0.1$ , \* $p < 0.05$ , \*\* $p < 0.01$ , \*\*\* $p < 0.001$ .

**Table OA.11 Analysis with Year Effects and Excluding Deaths in 2020**

| Sample<br>Outcome       | Excluding deaths in 2020 |                    |                    |                    |
|-------------------------|--------------------------|--------------------|--------------------|--------------------|
|                         | Colonoscopy in 3 months  |                    | 2-year mortality   |                    |
|                         | Linear<br>(1)            | Quadratic<br>(2)   | Linear<br>(3)      | Quadratic<br>(4)   |
| Flag                    | 0.062**<br>(0.019)       | 0.061**<br>(0.022) | -0.068*<br>(0.028) | -0.075*<br>(0.032) |
| Controls                | Yes                      | Yes                | Yes                | Yes                |
| Bandwidth<br>(interval) | [-0.068, 0.069]          | [-0.086, 0.105]    | [-0.080, 0.055]    | [-0.103, 0.102]    |
| Mean below cutoff       | 0.030                    | 0.030              | 0.108              | 0.093              |
| Observations            | 5,774                    | 11,170             | 6,601              | 15,354             |

*Notes.* The table presents the estimates using local linear regression (columns 1 and 3) or local quadratic regression (columns 2 and 4) with a triangular weighting kernel. Control variables include age, sex, race, and insurance type (Medicare, Medicaid, military, commercial, self-pay) in all columns and year dummies in columns 1 and 2. Bandwidth shows the interval centered around the cutoff point, 0.150, using MSE optimal bandwidths (Calonico et al. 2014). Robust standard errors are reported in parentheses. Total observations: 61,478 (columns 1 and 2), and 45,987 (columns 3 and 4, includes risk scores until December 2021).

## Online Appendix L: Analysis of CRC Diagnosis Stages and Time to Diagnosis

In this section, we explore a potential mechanism underlying reduced mortality by analyzing the time to CRC diagnosis and the stages at diagnosis. It is important to interpret the findings here with caution, given the limited number of diagnosed cases: 59 in the control group and 23 in the treated group. Due to this small sample size, we cannot apply an RD design to estimate the treatment effect on diagnosis stages reliably. 82 observations across the risk scores are insufficient for RD analysis, which requires a larger sample to estimate the regression functions validly.

Additionally, the program's intervention (flagging and inviting patients for colonoscopy) increased colonoscopy uptake among treated group patients but not among control group patients. Consequently, control group patients are more likely to have missed CRC diagnoses. This introduces a potential selection bias when comparing diagnosis stages across groups. For example, control group patients who are not invited for a colonoscopy but are diagnosed with CRC may have more regular medical check-ups, which could influence their diagnosis stage independently of the intervention.

Considering these limitations, we compared the average diagnosis stages between groups. We collected data on CRC stages. Stages are recorded from stage 0 to stage 4 (stage 0 being the earliest stage). In the control group ( $n = 59$ ), the mean diagnosis stage is 2.57, whereas in the treated group ( $n = 23$ ), the mean diagnosis stage is 3.15 ( $t$ -test = 1.99,  $p$ -value = 0.053). This is an expected finding because the treated group has riskier characteristics (e.g., older), which increases the likelihood of developing CRC at more advanced stages. Although the treated group had, on average, later-stage diagnoses than the control group, they exhibited a shorter time to diagnosis from the date of risk score calculation: 211 days for the treated group versus 266 days for the control group ( $t$ -test = -0.903,  $p$ -value = 0.371).

When restricting the sample to within the MSE-optimal bandwidth around the cutoff  $[-0.088, 0.112]$ , this is the bandwidth of Table 3 column (2) in the paper), the average stages are 2.59 for the control group ( $n = 24$ ), and 3.20 for the treated group ( $n = 13$ ,  $t$ -test = 1.689,  $p$ -value = 0.103). The time to diagnosis within this bandwidth is 224 days for the treated group and 240 days for the control group ( $t$ -test = -0.180,  $p$ -value = 0.858). In summary, this exploratory analysis does not find strong evidence that the treated group had significantly earlier CRC diagnoses. However, the findings here should be interpreted with caution, primarily due to the limited number of diagnosed cases and the possibility that control group patients may have missed diagnoses because they were not invited for a colonoscopy by the program. Therefore, there could be more control group patients who develop later-stage CRC without being diagnosed within the sample period, or even die without a CRC diagnosis (for example, they may be diagnosed post-mortem with carcinoma of unknown primary after metastasis). We recommend that future research, with a larger sample size of diagnosed cases, rigorously examine whether earlier diagnosis serves as a mechanism for reducing mortality.

## References

- Calonico S, Cattaneo MD, Titiunik R (2014) Robust nonparametric confidence intervals for regression-discontinuity designs. *Econometrica* 82(6):2295–2326.
- McCrary J (2008) Manipulation of the running variable in the regression discontinuity design: A density test. *Journal of Econometrics* 142(2):698–714.
